# Supplementary material for: The correlation between Arctic sea ice, cloud phase and radiation using A-Train satellites
Source: Copernicus journal article supplement (doi:10.5194/acp-24-7899-2024), 2024-07-11
Supplement: Supplementary file 1 [file acp-24-7899-2024-supplement.pdf]

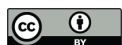

*Supplement of*

## **The correlation between Arctic sea ice, cloud phase and radiation using A-Train satellites**

**Grégory V. Cesana et al.**

*Correspondence to:* Grégory V. Cesana ([gregory.cesana@columbia.edu](mailto:gregory.cesana@columbia.edu))

The copyright of individual parts of the supplement might differ from the article licence.

**Table S1.** Mean ratio (%) of mixed-phase to liquid plus mixed-phase clouds for each dataset. Datasets are subset to 2007-2010.

| (%)                     | <b>DARDAR</b> | <b>PHACT</b> | <b>CERES</b> | <b>GOCCP</b> |
|-------------------------|---------------|--------------|--------------|--------------|
| <b>mix/(liquid+mix)</b> | 50            | 27           | N/A          | 20           |

**Table S2.** Sensitivity of spatial correlations between cloud types and SIC to SIC thresholds for all seasons and for PHACT (2007-2020).

| PHACT         |            |            |            |            |            |
|---------------|------------|------------|------------|------------|------------|
| 0.99 and 0.01 | <b>DJF</b> | <b>MAM</b> | <b>JJA</b> | <b>SON</b> | <b>ANN</b> |
| $\Delta Ice$  | -0.05      | 0.13       | 0.11       | 0.15       | 0.23       |
| $\Delta Liq$  | -0.45      | -0.25      | 0.11       | -0.29      | -0.39      |
| $\Delta Mix$  | -0.57      | -0.39      | -0.05      | -0.46      | -0.48      |
| $\Delta Tot$  | -0.55      | -0.32      | 0.13       | -0.45      | -0.44      |
| 0.98 and 0.02 | <b>DJF</b> | <b>MAM</b> | <b>JJA</b> | <b>SON</b> | <b>ANN</b> |
| $\Delta Ice$  | -0.03      | 0.16       | 0.12       | 0.16       | 0.23       |
| $\Delta Liq$  | -0.46      | -0.26      | 0.10       | 7-0.30     | -0.38      |
| $\Delta Mix$  | -0.56      | -0.39      | -0.05      | -0.45      | -0.46      |
| $\Delta Tot$  | -0.55      | -0.31      | 0.12       | -0.45      | -0.43      |
| 0.97 and 0.03 | <b>DJF</b> | <b>MAM</b> | <b>JJA</b> | <b>SON</b> | <b>ANN</b> |
| $\Delta Ice$  | 0.02       | 0.19       | 0.12       | 0.15       | 0.23       |
| $\Delta Liq$  | -0.47      | -0.28      | 0.10       | -0.30      | -0.34      |
| $\Delta Mix$  | -0.55      | -0.39      | -0.04      | -0.43      | -0.42      |
| $\Delta Tot$  | -0.55      | -0.33      | 0.13       | -0.44      | -0.39      |

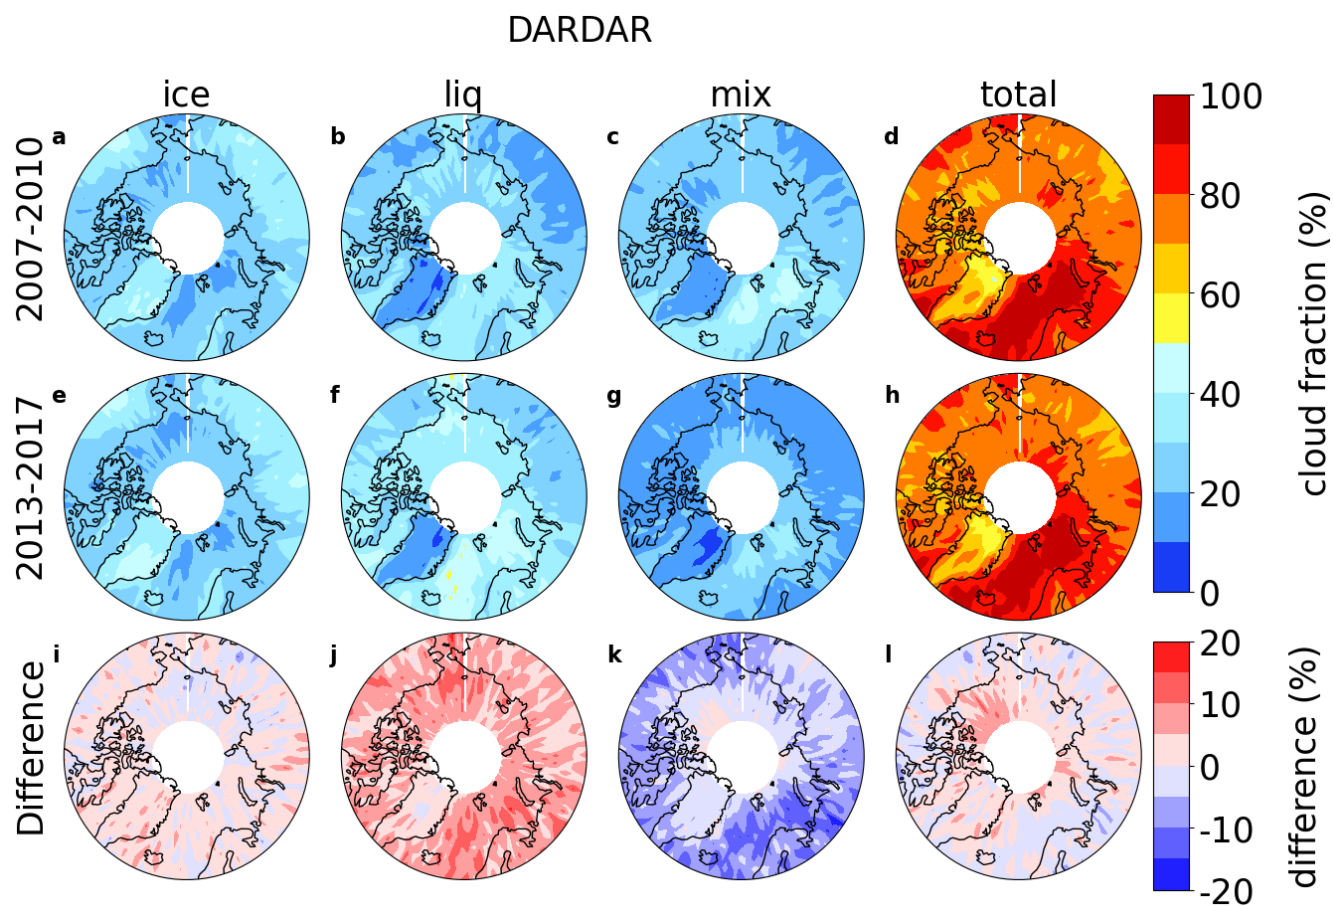

**Figure S1.** DARDAR cloud cover differences (bottom row) between daytime observing period (2013-2017; middle row) and daytime and nighttime observing period (2007-2010; top row).

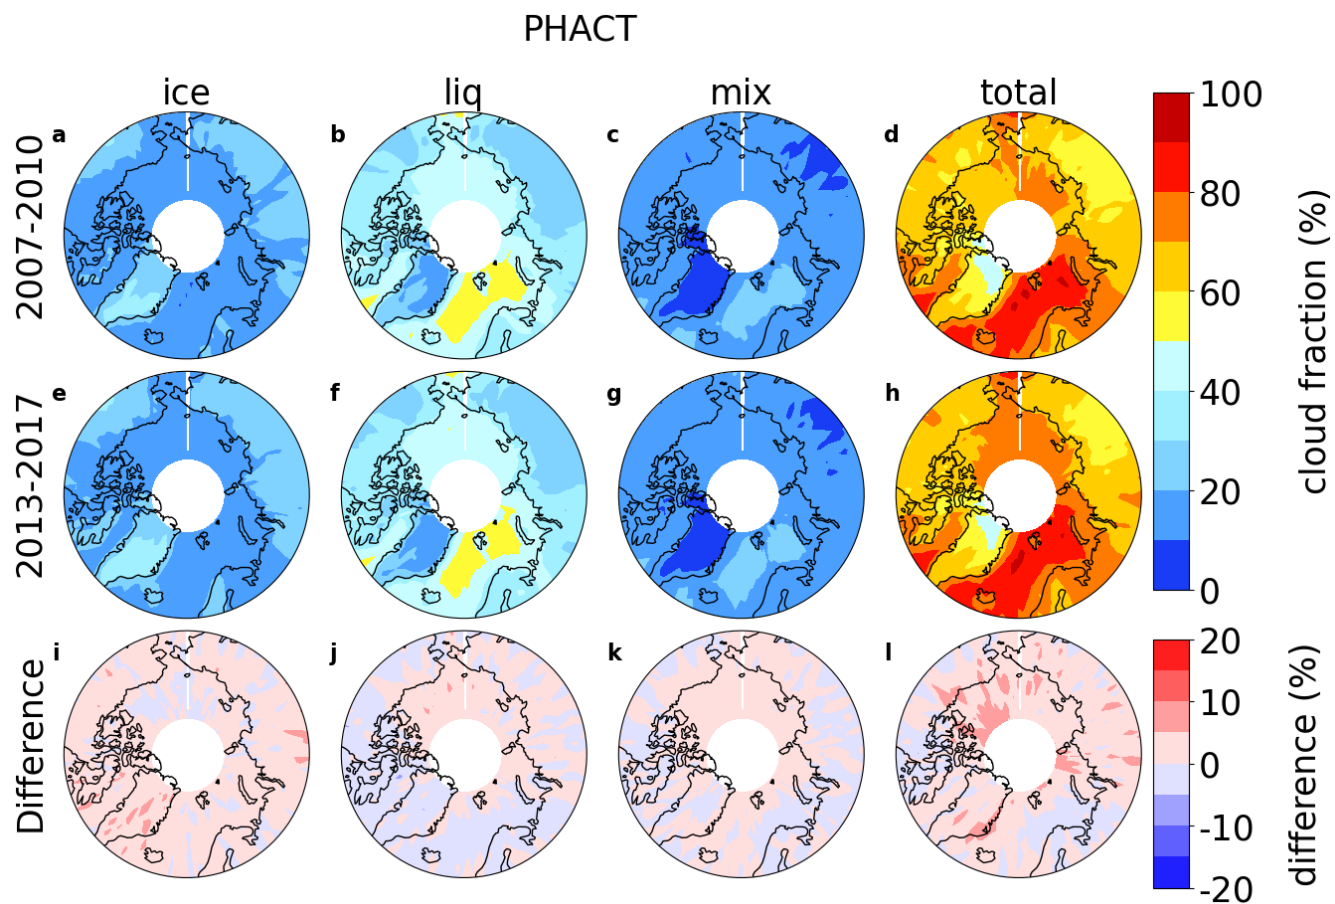

**Figure S2.** Same as Fig. S1 for PHACT, except that daytime and nighttime data are used in both time periods.

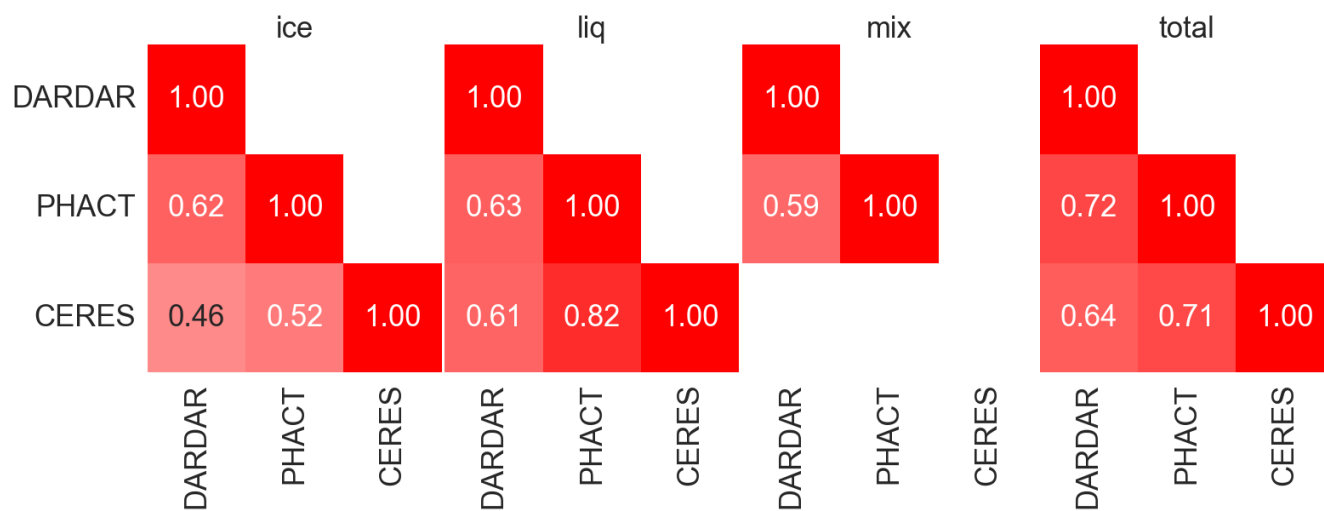

**Figure S3.** Pattern correlation between datasets for the different cloud covers (subset to 2007-2010).

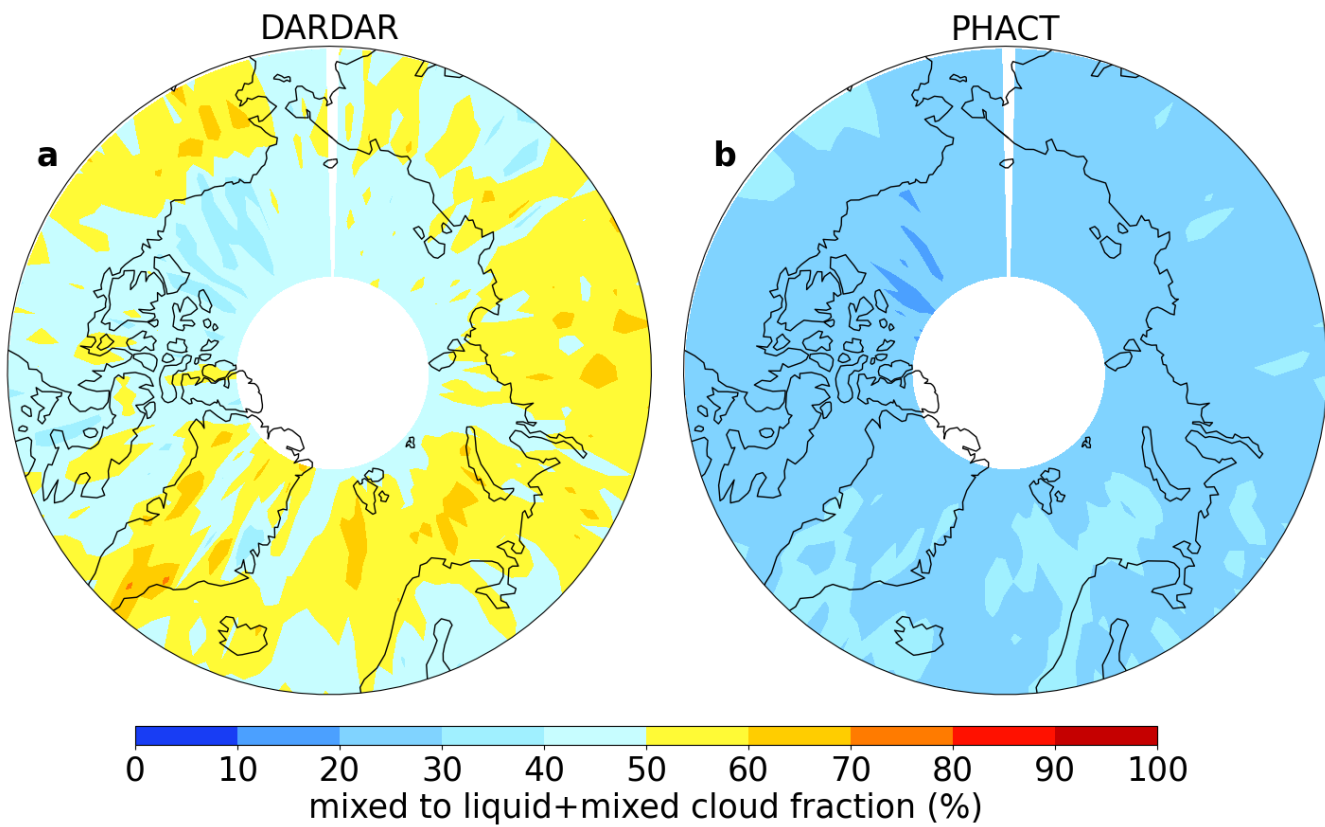

**Figure S4.** Ratio (%) of mixed-phase to liquid plus mixed-phase clouds for DARDAR (left) and PHACT (right). Datasets are subset to 2007-2010.

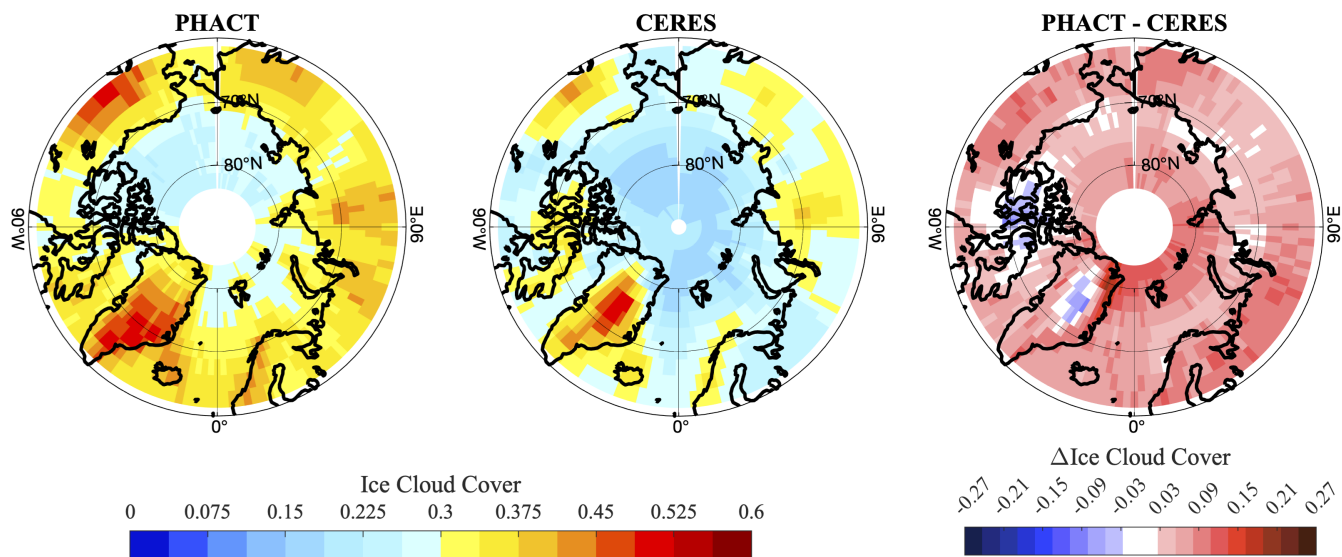

**Figure S5.** PHACT ice cloud cover when accounting for all ice-only and ice-above-liquid clouds compared to CERES ice cloud cover.

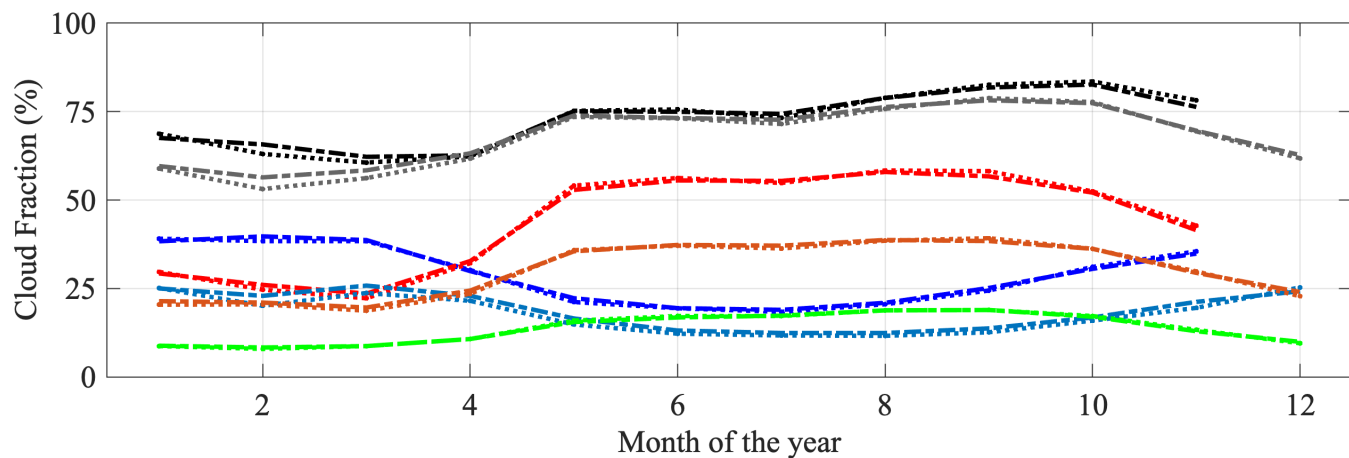

**Figure S6.** Effect of using 4 years (dotted) instead of 14 (dash dotted) on the seasonal cycle of cloud covers from PHACT and CERES.

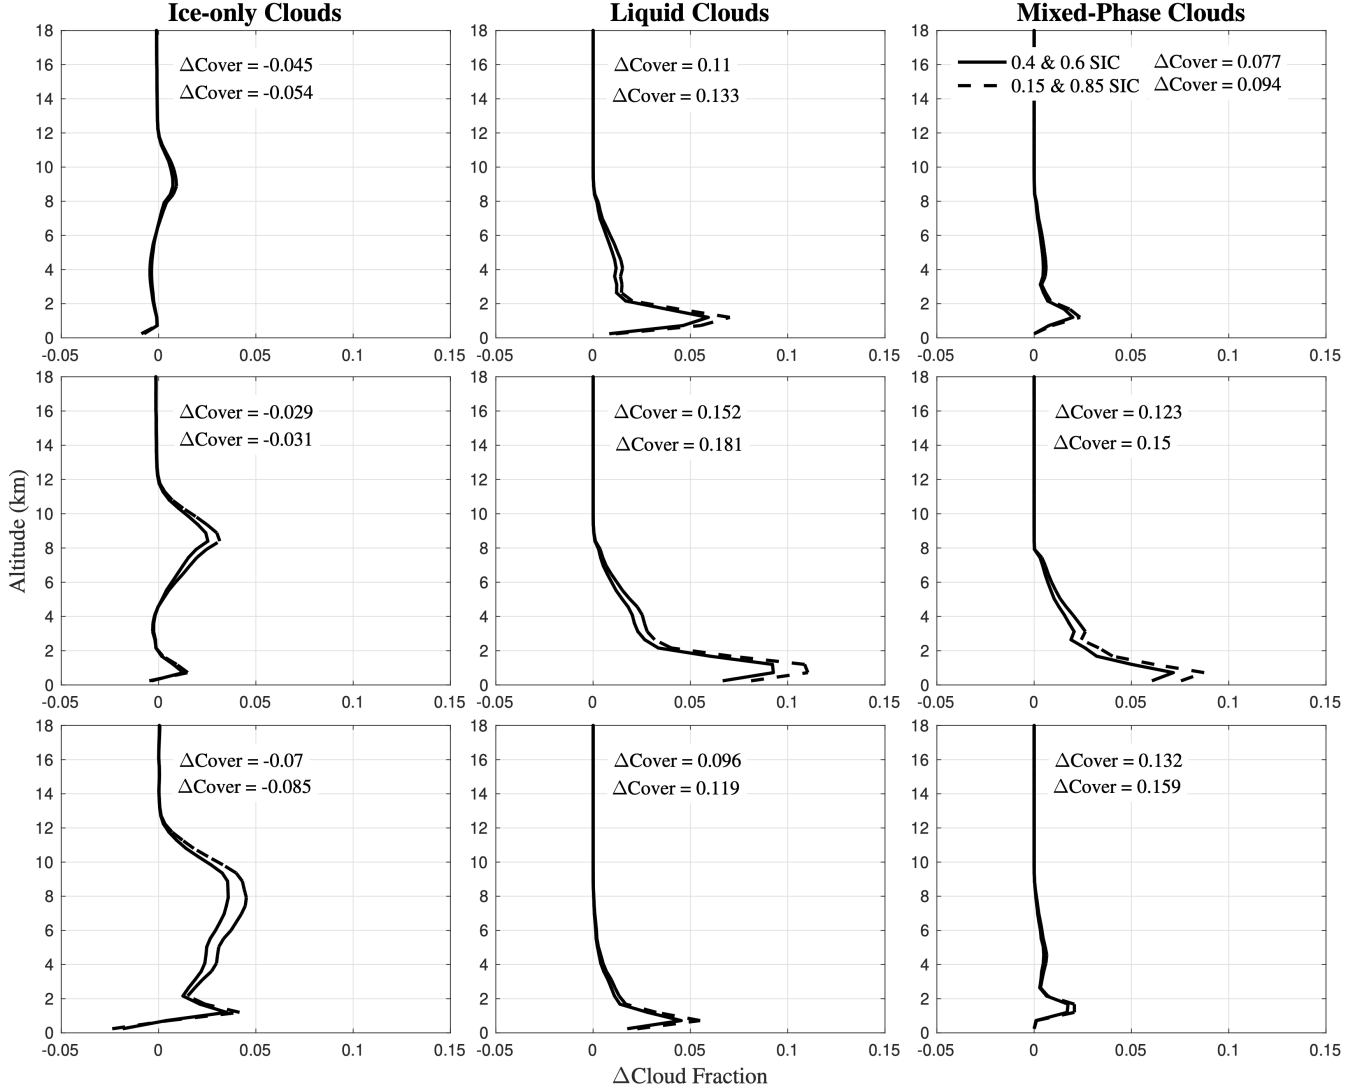

**Figure S7.** Effect of using 0.85 and 0.15 SIC thresholds (dashed lines) for sea-ice and open-ocean dominated grid boxes, respectively, on the relationship between cloud profiles and SIC in PHACT (up), CALIPSO-GOCCP (middle) and DARDAR (bottom). The original SIC thresholds are 0.6 and 0.4 (solid lines). The corresponding cloud covers are shown on each subplot.
